# Supplementary material
Source: Springer Nature journal article supplement (https://www.springermedizin.de/resource/supplementary/12985_2011_1371_MOESM5_ESM.pdf/9609660)

Anti-FLAG

Anti-NS1/2

Overlay

Overlay/DAPI

Mock

NS1F

NS1F

-ELCmut

NS1F

NS1F

-ELCmut

NS1F

NS1F

-ELCmut

NS1F

NS1F

-ELCmut

15 h pi

24 h pi

32 h pi

48 h pi

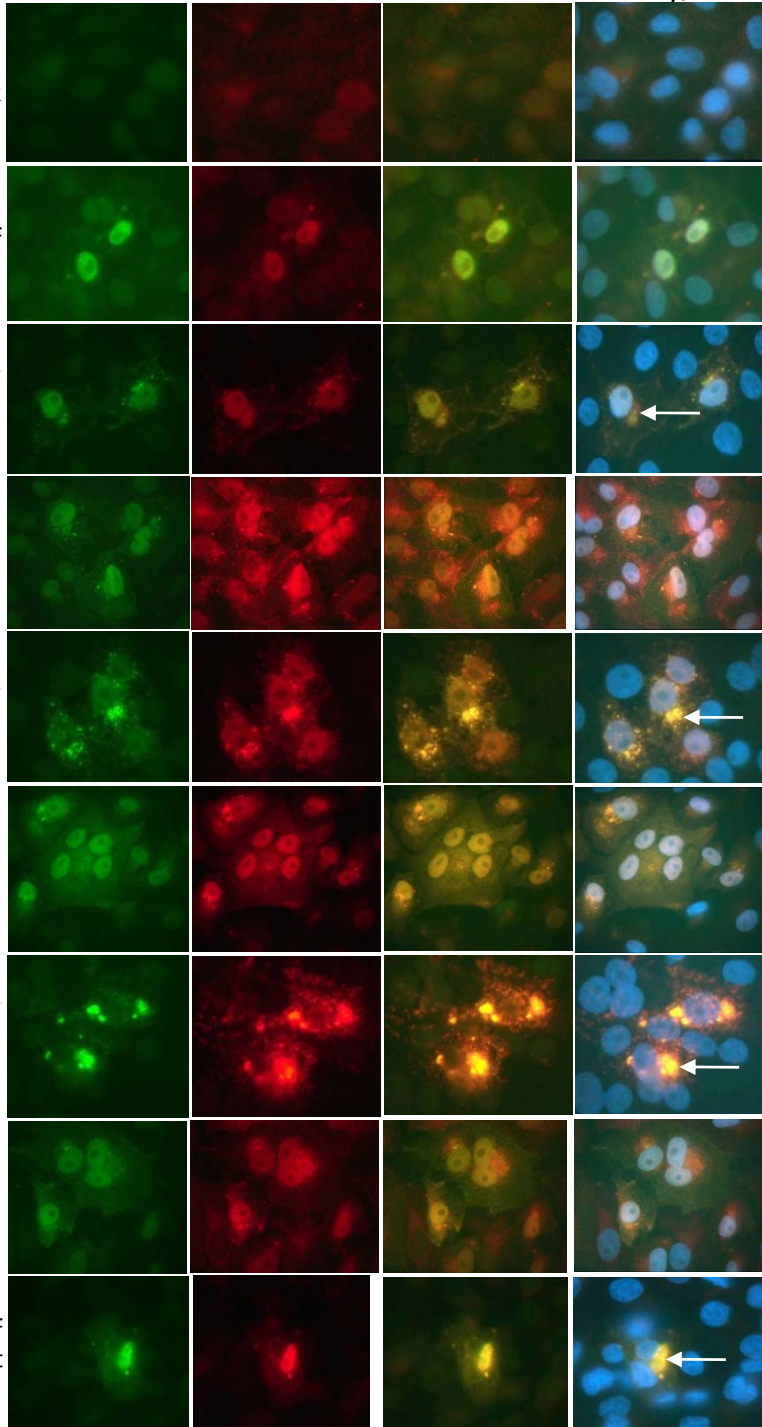

Supplement: MOESM5 [file 9609660]
